# Supplementary material
Source: publisher figshare collection journal article supplement (https://acs.figshare.com/ndownloader/files/15635795)
Supplement: Supplementary file 1 [file 15635795]

*Supporting Information*

# Defect structure and photovoltaic characteristics of internally stacked CuO/Cu<sub>2</sub>O photoactive layer prepared by electrodeposition and heating

*Masanobu Izaki,<sup>\*,†</sup> Kazuma Fukazawa,<sup>†</sup> Kenta Sato,<sup>†</sup> Pei Loon Khoo,<sup>†</sup> Masakazu*

*Kobayashi,<sup>†</sup> Akihisa Takeuchi,<sup>‡</sup> Kentaro Uesugi<sup>‡</sup>*

<sup>†</sup>Toyohashi University of Technology, 1-1 Hibarigaoka, Tempaku-cho, Toyohashi-shi 441-8580 JAPAN

<sup>‡</sup>Japan Synchrotron Radiation Institute, 1-1 Kouto, Sayo-cho, Sayo-gun, Hyogo, 679-5198 JAPAN

\*Corresponding author

E-mail address: [m-izaki@me.tut.ac.jp](mailto:m-izaki@me.tut.ac.jp)

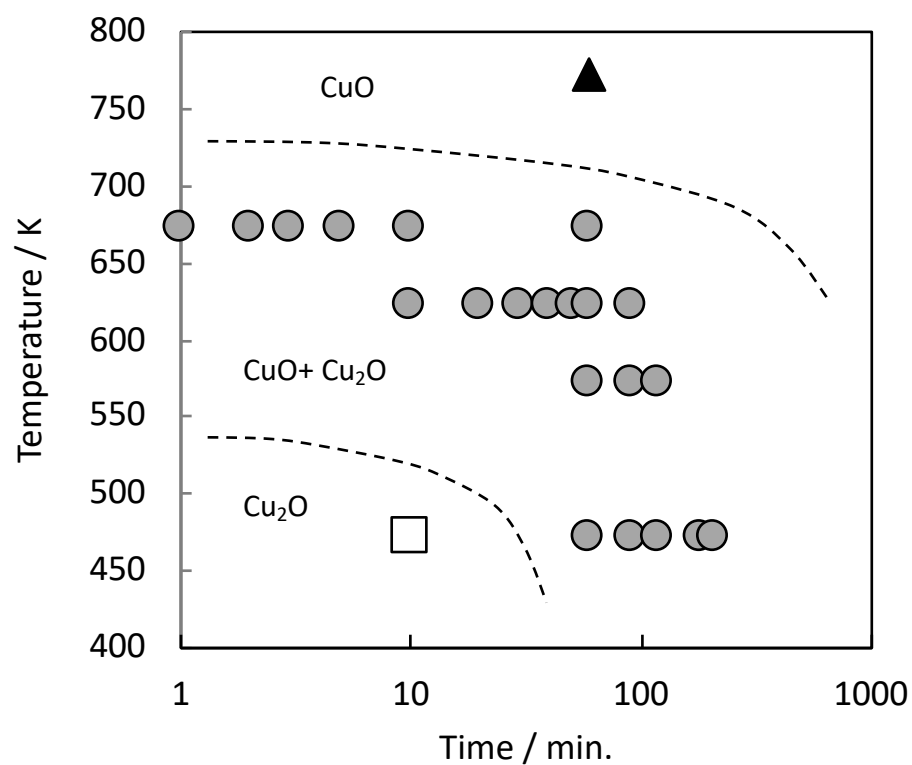

Figure S1 Effects of heating temperature and time on the phase structure of  $\text{Cu}_2\text{O}$  layer prepared by electrodeposition. The phase was identified with X-ray diffraction, absorption spectra, and SEM observation.

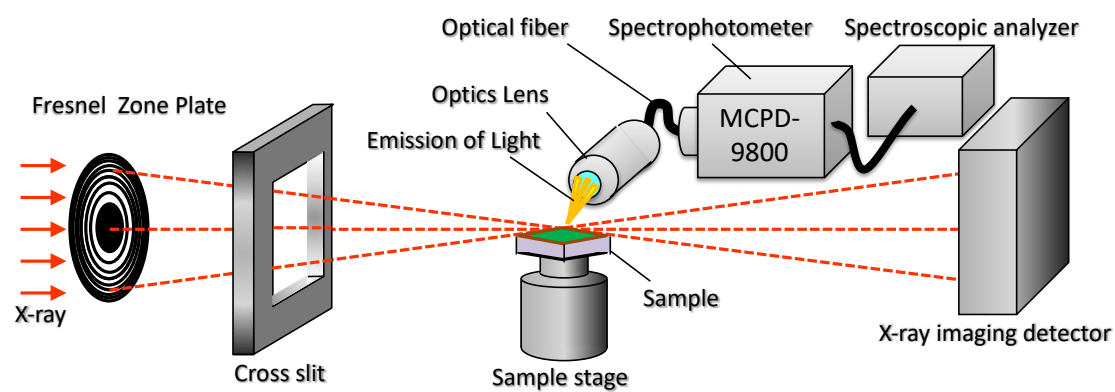

Figure S2 Schematic illustration of set-up at BL20XU in SPring-8 for Nano-scale x-ray tomography using the X-ray imaging detector and room temperature photoluminescence spectra measurements using the spectrophotometer.

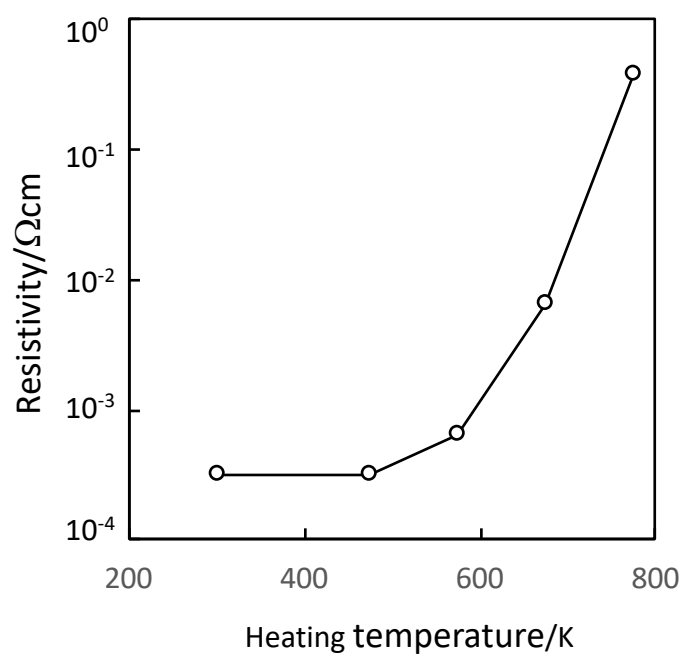

Figure S3 Effect of heating temperature in air on the resistivity estimated for the Ga:ZnO layer with a Hall-effect measurement system (Toyo-technica Resitest 8320)
